# Supplementary material for: Psychological interventions for mental health disorders in children with chronic physical illness: a systematic review
Source: HighWire-hosted journal article supplement (doi:10.1136/archdischild-2014-307474), 2015-03-17
Supplement: archdischild-2014-307474supp.pdf [file archdischild-2014-307474supp.pdf]

# Appendix 1

## Search terms

The search terms were as follows: (chronicNEXTillness OR AIDS\* OR Arthriti\* OR asthma\* OR cancer\* Or chronic fatigue OR cleft\* OR cystic fibrosis\* OR CF OR deaf\* OR diabet\* OR epilep\* OR heart\* OR hearing\* OR HIV OR inflammatory bowel\* OR IBD OR kidney OR liver OR migrain\* OR seizure\* OR sickle cell\* OR spina bifida OR vision\*) AND (psychotherap\* OR cognitive therap\* OR cognitive behavior therapy\* OR cognitive behaviour therap\* OR CBT OR psychol\* OR behavio\* NEXT (therap\* OR treat\* OR modif\*) OR group NEXT (treat\* OR therap\*) OR \*dynamic NEXT (treat\* OR therap\*) OR \*analytic OR counsel\* OR psycho-ed\* OR family NEXT (therap\* OR treat\* OR intervene\*) OR system\*NEXT (therap\* or treat\*) AND (anx\* OR depress\* OR conduct disorder\* OR panic\* OR obsess\* OR OCD).

\*MeSH terms were included where appropriate

\*Terms were adapted for different databases as necessary

## Appendix 2

### Summary of Quality Evaluation

| Study                            | Selection Bias | Design   | Confounders | Blinding | Data Collection Methods | Withdrawals and Dropouts | Global Quality Rating |
|----------------------------------|----------------|----------|-------------|----------|-------------------------|--------------------------|-----------------------|
| Blocher et al. (2013)            | Moderate       | Moderate | Moderate    | Weak     | Strong                  | Strong                   | Moderate              |
| Hains et al. (1997)              | Weak           | Moderate | Moderate    | Moderate | Strong                  | Strong                   | Moderate              |
| Hains et al. (2001)              | Weak           | Moderate | Moderate    | Weak     | Strong                  | Weak                     | Weak                  |
| Martinovic et al. (2006)         | Moderate       | Strong   | Strong      | Moderate | Strong                  | Strong                   | Strong                |
| McGrady & Hood (2013)            | Strong         | Moderate | Moderate    | Moderate | Strong                  | Moderate                 | Strong                |
| Papneja & Manassis (2006)        | Moderate       | Moderate | Moderate    | Moderate | Strong                  | N/A                      | Strong                |
| Reigada et al. (2013)            | Moderate       | Moderate | Moderate    | Moderate | Strong                  | Moderate                 | Strong                |
| Rossello & Jiminez-Chafey (2006) | Moderate       | Moderate | Moderate    | Weak     | Strong                  | Moderate                 | Moderate              |
| Szigethy et al. (2007)           | Moderate       | Strong   | Strong      | Moderate | Strong                  | Strong                   | Strong                |

|                              |          |          |          |          |        |        |        |
|------------------------------|----------|----------|----------|----------|--------|--------|--------|
| Szigethy<br>et al.<br>(2004) | Moderate | Moderate | Moderate | Moderate | Strong | Strong | Strong |
|------------------------------|----------|----------|----------|----------|--------|--------|--------|
